# Supplementary material
Source: Springer Nature journal article supplement (https://www.springermedizin.de/resource/supplementary/12967_2011_768_MOESM4_ESM.pdf/9577462)

**A.****Day 0**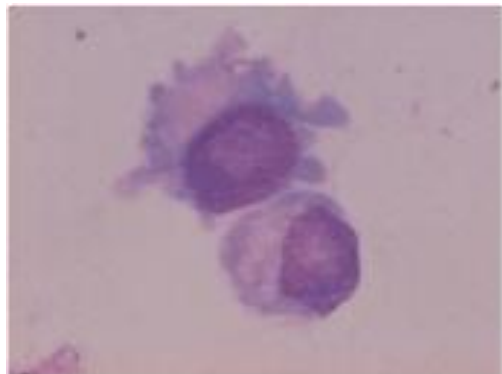**Day 4**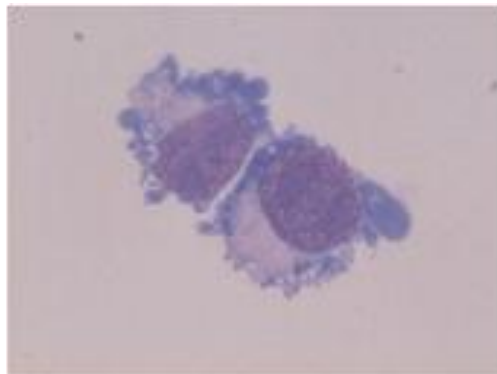**Day 7**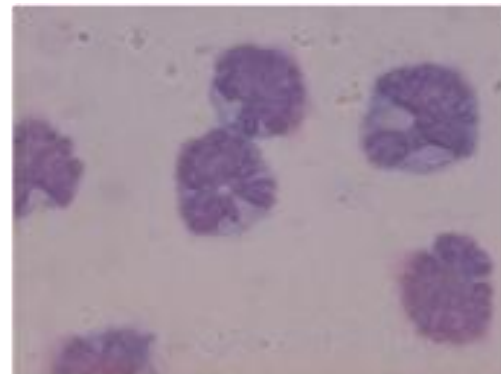**B.**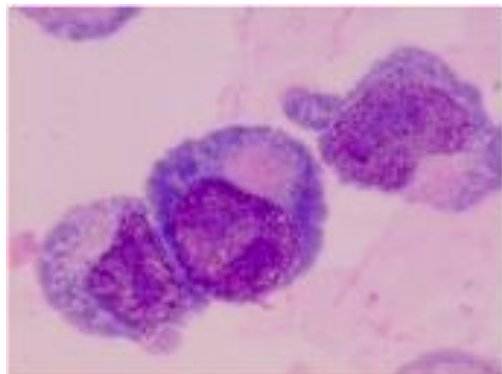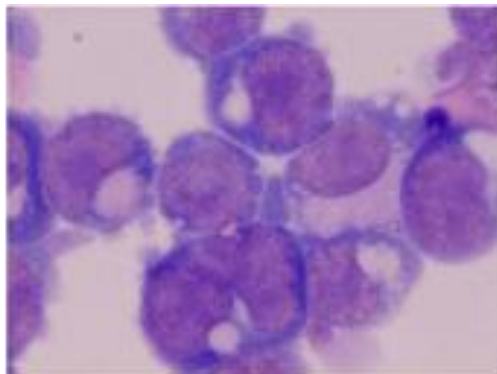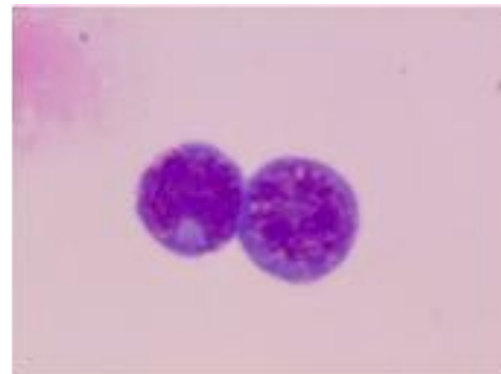

Supplement: MOESM4 [file 9577462]
